# Supplementary material for: Increased expression of tryptophan and tyrosine tRNAs elevates stop codon readthrough of reporter systems in human cell lines
Source: PubMed Central journal article supplement — Nucleic Acids Res. 2021 May 1;49(9):5202–15. doi: 10.1093/nar/gkab315 (PMC8136774; doi:10.1093/nar/gkab315), 2021-05-01
Supplement: gkab315_supplemental_file.pdf [file gkab315_supplemental_file.pdf]

# **Increased expression of tryptophan and tyrosine tRNAs elevates stop codon readthrough of reporter systems in human cell lines.**

Petra Beznosková<sup>1\*</sup>, Laure Bidou<sup>2,3</sup>, Olivier Namy<sup>3</sup> and Leoš Shivaya Valášek<sup>1\*</sup>

<sup>1</sup>Laboratory of Regulation of Gene Expression, Institute of Microbiology ASCR, Videnska 1083, 142 20, Prague, the Czech Republic

<sup>2</sup> Sorbonne Universités, Paris, France.

<sup>3</sup> Université Paris-Saclay, CEA, CNRS, Institute for Integrative Biology of the Cell (I2BC), 91198, Gif-sur-Yvette, France.

\* To whom correspondence should be addressed. [valasekl@biomed.cas.cz](mailto:valasekl@biomed.cas.cz)  
[p.beznoskova@seznam.cz](mailto:p.beznoskova@seznam.cz)  
Tel: +420 241 062 288  
Fax: +420 241 062 665

Running title: human tRNAs regulate readthrough

## SUPPLEMENTAL INFORMATION

### EXPERIMENTAL PROCEDURES

#### Construction of plasmids

List of all plasmids, PCR primers and Genestrings used throughout this study can be found in Tables S1, S2 and S3, respectively.

PBB166 (=SW148 lacking *KpnI* site) was created by altering SW148 plasmid by digestion with *KpnI*, trimming by T4 DNA polymerase and subsequent self-ligation.

PBB168 was created by inserting the undigested PCR product obtained with primers PB159 and PB160 using vector Addgene53188 as template into *SspI* digested PBB166.

PBB170 was created by inserting the *SalI-NotI* digested fragment from SW174 into *SalI-NotI* digested PBB168.

PBB171 was created by inserting the *SalI-NotI* digested fragment from SW149 into *SalI-NotI* digested PBB168.

PBB171 was created by inserting the *SalI-NotI* digested fragment from SW150 into *SalI-NotI* digested PBB168.

PBB180 was created by inserting the *Apal/KpnI* fragment from annealed primers PB162 and PB167 into *Apal/KpnI* digested PBB168.

PBB185 was created by inserting the *SalI-NotI* digested fragment from PBB170 into *SalI-NotI* digested PBB180.

PBB220 was created by inserting the *SalI-NotI* digested fragment from PBB171 into *SalI-NotI* digested PBB180.

PBB184 was created by inserting the *Apal/KpnI* fragment from annealed primers PB162 and PB167 into *Apal/KpnI* digested PBB172.

PBB181 was created by inserting the *SalI-NotI* digested fragment from PBB168 into *SalI-NotI* digested PBB187.

PBB187 was created by inserting the *Apal/KpnI* fragment from annealed primers PB164 and PB169 into *Apal/KpnI* digested PBB172.

PBB182 was created by inserting the *Apal/KpnI* fragment from annealed primers PB166 and PB171 into *Apal/KpnI* digested PBB168.

PBB189 was created by inserting the *SalI-NotI* digested fragment from PBB172 into *SalI-NotI* digested PBB182.

PBB204 was created by inserting the *SalI-NotI* digested fragment from PBB168 into *SalI-NotI* digested PBB198.

PBB206 was created by inserting the *SalI-NotI* digested fragment from PBB170 into *SalI-NotI* digested PBB198.

PBB207 was created by inserting the *SalI-NotI* digested fragment from PBB171 into *SalI-NotI* digested PBB198.

PBB198 was created by inserting the *Apal/KpnI* fragment from annealed primers PB177 and PB178 into *Apal/KpnI* digested PBB172.

PBB288 was created by inserting the *PmeI* digested fragment from Genestring SG7 into *PmeI* digested PBB207.

PBB292 was created by inserting the *PmeI* digested fragment from Genestring SG8 into *PmeI* digested PBB180.

PBB214 was created by inserting the *SalI-NotI* digested fragment from PBB168 into *SalI-NotI* digested PBB196.

PBB196 was created by inserting the *Apal/KpnI* fragment from annealed primers PB175 and PB176 into *Apal/KpnI* digested PBB172.

PBB313 was created by inserting undigested fragment from Genestring SG16 into *SspI* digested PBB166.

PBB314 was created by inserting undigested fragment from Genestring SG17 into *SspI* digested PBB166.

PBB315 was created by inserting undigested fragment from Genestring SG18 into *SspI* digested PBB166.

PBB316 was created by inserting undigested fragment from Genestring SG19 into *SspI* digested PBB166.

PBB317 was created by inserting undigested fragment from Genestring SG20 into *SspI* digested PBB166.

PBB318 was created by inserting undigested fragment from Genestring SG21 into *SspI* digested PBB166.

PBB319 was created by inserting undigested fragment from Genestring SG22 into *SspI* digested PBB166.

PBB320 was created by inserting undigested fragment from Genestring SG23 into *SspI* digested PBB166.

PBB336 was created by inserting *PmeI* digested fragment from Genestring SG24 into *SspI* digested PBB166.

PBB337 was created by inserting *PmeI* digested fragment from Genestring SG25 into *SspI* digested PBB166.

PBB338 was created by inserting *PmeI* digested fragment from Genestring SG26 into *SspI* digested PBB166.

PBB293 was created by inserting *SalI/BamHI* digested fragment from Genestring SG7 into *SalI/BamHI* digested GL3051.

PBB293 was created by inserting *SalI/BamHI* digested fragment from Genestring SG7 into *SalI/BamHI* digested GL3051.

PBB306 was created by inserting *SalI/BamHI* digested fragment from Genestring SG9 into *SalI/BamHI* digested GL3051.

PBB307 was created by inserting *SalI/BamHI* digested fragment from Genestring SG10 into *SalI/BamHI* digested GL3051.

PBB308 was created by inserting *SalI/BamHI* digested fragment from Genestring SG11 into *SalI/BamHI* digested GL3051.

PBB309 was created by inserting *SalI/BamHI* digested fragment from Genestring SG12 into *SalI/BamHI* digested GL3051.

PBB310 was created by inserting *SalI/BamHI* digested fragment from Genestring SG13 into *SalI/BamHI* digested GL3051.

PBB311 was created by inserting *SalI/BamHI* digested fragment from Genestring SG14 into *SalI/BamHI* digested GL3051.

PBB295 was created by inserting *SalI/BamHI* digested fragment from Genestring SG7 into *SalI/BamHI* digested GL3052.

PBB294 was created by inserting *SalI/BamHI* digested fragment from Genestring SG8 into *SalI/BamHI* digested GL3051.

PBB296 was created by inserting *SalI/BamHI* digested fragment from Genestring SG8 into *SalI/BamHI* digested GL3052.

PBB371 was created by inserting *SalI/BamHI* digested fragment from Genestring SG7 into *SalI/BamHI* digested GL3101.

PBB373 was created by inserting *SalI/BamHI* digested fragment from Genestring SG7 into *SalI/BamHI* digested GL3102.

PBB372 was created by inserting *SalI/BamHI* digested fragment from Genestring SG8 into *SalI/BamHI* digested GL3101.

PBB374 was created by inserting *SalI/BamHI* digested fragment from Genestring SG8 into *SalI/BamHI* digested GL3102.

PBB297 was created by inserting *SalI/BamHI* digested fragment from Genestring SG7 into *SalI/BamHI* digested GL3095.

PBB299 was created by inserting *SalI/BamHI* digested fragment from Genestring SG7 into *SalI/BamHI* digested GL3096.

PBB298 was created by inserting *SalI/BamHI* digested fragment from Genestring SG8 into *SalI/BamHI* digested GL3095.

PBB300 was created by inserting *SalI/BamHI* digested fragment from Genestring SG8 into *SalI/BamHI* digested GL3096.

HR4 was created by inserting *SalI/BamHI* digested fragment from Genestring SG7 into *SalI/BamHI* digested GL3107.

HR12 was created by inserting *SalI/BamHI* digested fragment from Genestring SG7 into *SalI/BamHI* digested GL3108.

HR5 was created by inserting *SalI/BamHI* digested fragment from Genestring SG8 into *SalI/BamHI* digested GL3107.

HR13 was created by inserting *SalI/BamHI* digested fragment from Genestring SG8 into *SalI/BamHI* digested GL3108.

PBB271 was created by inserting *SalI/SacI* digested fragment from Genestring SG1 into *SalI/SacI* digested PBB168.

PBB272 was created by inserting *SalI/SacI* digested fragment from Genestring SG2 into *SalI/SacI* digested PBB168.

PBB273 was created by inserting *SalI/SacI* digested fragment from Genestring SG3 into *SalI/SacI* digested PBB168.

PBB274 was created by inserting *SalI/SacI* digested fragment from Genestring SG4 into *SalI/SacI* digested PBB168.

PBB275 was created by inserting *SalI/SacI* digested fragment from Genestring SG1 into *SalI/SacI* digested PBB207.

PBB276 was created by inserting *SalI/SacI* digested fragment from Genestring SG2 into *SalI/SacI* digested PBB207.

PBB277 was created by inserting *SalI/SacI* digested fragment from Genestring SG3 into *SalI/SacI* digested PBB207.

PBB278 was created by inserting *SalI/SacI* digested fragment from Genestring SG4 into *SalI/SacI* digested PBB207.

PBB219 was created by inserting the *SalI-NotI* digested fragment from PBB177 into *SalI-NotI* digested PBB172.

PBB234 was created by inserting the *SalI-NotI* digested PCR product obtained with primers PB43 and PB187 using PBB219 as template into *SalI-NotI* digested PBB219.

PBB223 was created by inserting the *SalI-NotI* digested fragment from PBB177 into *SalI-NotI* digested PBB207.

PBB235 was created by inserting the *SalI-NotI* digested fragment from PBB234 into *SalI-NotI* digested PBB207.

PBB301 was created by inserting *PmeI* digested fragment from Genestring SG7 into *SmaI* digested PBB321 (p53BS-luci).

PBB407 was created by Site-directed mutagenesis of pCMV-p53-WT (PBB395) using primers PB212 and PB213.

PBB400 was created by Site-directed mutagenesis of pCMV-p53-WT (PBB395) using primers PB216 and PB217.

PBB301 was created by inserting two *PmeI* digested fragments from Genestring SG7 into *SmaI* digested PBB321 (p53BS-luci).

PBB332 was created by inserting *PmeI* digested fragment from Genestring SG8 into *SmaI* digested PBB321 (p53BS-luci).

PBB380 was created by inserting *SalI/BamHI* digested fragment from PBB375 into *SalI/BamHI* digested GL3101.

PBB382 was created by inserting *SalI/BamHI* digested fragment from PBB375 into *SalI/BamHI* digested GL3102.

## REFERENCES

1. Grentzmann, G., Ingram, J.A., Kelly, P.J., Gesteland, R.F. and Atkins, J.F. (1998) A dual-luciferase reporter system for studying recoding signals. *RNA*, **4**, 479-486.
2. Loughran, G., Howard, M.T., Firth, A.E. and Atkins, J.F. (2017) Avoidance of reporter assay distortions from fused dual reporters. *RNA*, **23**, 1285-1289.
3. Floquet, C., Deforges, J., Rousset, J.P. and Bidou, L. (2011) Rescue of non-sense mutated p53 tumor suppressor gene by aminoglycosides. *Nucleic Acids Res*, **39**, 3350-3362.
4. Chan, P.P. and Lowe, T.M. (2016) GtRNADB 2.0: an expanded database of transfer RNA genes identified in complete and draft genomes. *Nucleic Acids Res*, **44**, D184-189.
5. Chan, P.P. and Lowe, T.M. (2009) GtRNADB: a database of transfer RNA genes detected in genomic sequence. *Nucleic Acids Res*, **37**, D93-97.
6. Firth, A.E., Wills, N.M., Gesteland, R.F. and Atkins, J.F. (2011) Stimulation of stop codon readthrough: frequent presence of an extended 3' RNA structural element. *Nucleic Acids Res*, **39**, 6679-6691.
7. Napthine, S., Yek, C., Powell, M.L., Brown, T.D. and Brierley, I. (2012) Characterization of the stop codon readthrough signal of Colorado tick fever virus segment 9 RNA. *RNA*, **18**, 241-252.



## SUPPLEMENTAL TABLES

**Table S1.** Plasmids used in this study.

| <b>Plasmid</b> | <b>Description</b>             | <b>Source of reference</b> |
|----------------|--------------------------------|----------------------------|
| SW148          | p2luci_UAG-TMV                 | (1)                        |
| SW147          | p2luci_UAA-TMV                 | (1)                        |
| SW149          | p2luci_UGA-TMV                 | (1)                        |
| SW150          | p2luci_CAG-TMV                 | (1)                        |
| PBB166         | SW148noKpnI                    | This study                 |
| PBB168         | p2luci-UAG-TMV-U6              | This study                 |
| PBB170         | p2luci-UAA-TMV-U6              | This study                 |
| PBB171         | p2luci-UGA-TMV-U6              | This study                 |
| PBB172         | p2luci-CAG-TMV-U6              | This study                 |
| PBB180         | p2luci-UAG-TMV-U6-tY01         | This study                 |
| PBB185         | p2luci-UAA-TMV-U6-tY01         | This study                 |
| PBB220         | p2luci-UGA-TMV-U6-tY01         | This study                 |
| PBB184         | p2luci-CAG-TMV-U6-tY01         | This study                 |
| PBB181         | p2luci-UAG-TMV-U6-tQ01         | This study                 |
| PBB187         | p2luci-CAG-TMV-U6-tQ01         | This study                 |
| PBB182         | p2luci-UAG-TMV-U6-tQ01s        | This study                 |
| PBB189         | p2luci-CAG-TMV-U6-tQ01s        | This study                 |
| PBB204         | p2luci-UAG-TMV-U6-tW01         | This study                 |
| PBB206         | p2luci-UAA-TMV-U6-tW01         | This study                 |
| PBB207         | p2luci-UGA-TMV-U6-tW01         | This study                 |
| PBB198         | p2luci-CAG-TMV-U6-tW01         | This study                 |
| PBB288         | p2luci-UGA-TMV-U6-tW01-U6-tW01 | This study                 |
| PBB292         | p2luci-UAG-TMV-U6-tY01-U6-tY01 | This study                 |
| PBB214         | p2luci-UAG-TMV-U6-tY02         | This study                 |
| PBB196         | p2luci-CAG-TMV-U6-tY02         | This study                 |
| PBB313         | p2luci_UAG-TMV_tY03            | This study                 |
| PBB314         | p2luci_UAG-TMV_tY04            | This study                 |
| PBB315         | p2luci_UAG-TMV_tY05            | This study                 |
| PBB336         | p2luci_UAG-TMV_tY05b           | This study                 |
| PBB337         | p2luci_UAG-TMV_tY05c           | This study                 |
| PBB338         | p2luci_UAG-TMV_tY05d           | This study                 |
| PBB316         | p2luci_UAG-TMV_tY06            | This study                 |
| PBB317         | p2luci_UAG-TMV_tY07            | This study                 |
| PBB318         | p2luci_UAG-TMV_tY08            | This study                 |
| PBB319         | p2luci_UAG-TMV_tY09            | This study                 |
| PBB320         | p2luci_UAG-TMV_tY10            | This study                 |
| GL3051         | pSGDluc_UGA-AQP4               | (2)                        |
| GL3052         | pSGDluc_UGG-AQP4               | (2)                        |

|        |                            |            |
|--------|----------------------------|------------|
| PBB293 | pSGDluc_UGA-AQP4-U6-tW01   | This study |
| PBB306 | pSGDluc_UGA-AQP4-U6-tW02   | This study |
| PBB307 | pSGDluc_UGA-AQP4-U6-tW03   | This study |
| PBB308 | pSGDluc_UGA-AQP4-U6-tW04   | This study |
| PBB309 | pSGDluc_UGA-AQP4-U6-tW05   | This study |
| PBB310 | pSGDluc_UGA-AQP4-U6-tW06   | This study |
| PBB311 | pSGDluc_UGA-AQP4-U6-tW07   | This study |
| PBB295 | pSGDluc_UGG-AQP4-U6-tW01   | This study |
| PBB294 | pSGDluc_UGA-AQP4-U6-tY01   | This study |
| PBB296 | pSGDluc_UGG-AQP4-U6-tY01   | This study |
| GL3101 | pSGDluc_UGA-MDH1           | (2)        |
| GL3102 | pSGDluc_UGG-MDH1           | (2)        |
| PBB371 | pSGDluc_UGA-MDH1-U6-tW01   | This study |
| PBB373 | pSGDluc_UGG-MDH1-U6-tW01   | This study |
| PBB372 | pSGDluc_UGA-MDH1-U6-tY01   | This study |
| PBB374 | pSGDluc_UGG-MDH1-U6-tY01   | This study |
| GL3095 | pSGDluc_UGA-ACP2-2         | (2)        |
| GL3096 | pSGDluc_UGG-ACP2-2         | (2)        |
| PBB297 | pSGDluc_UGA-ACP2-2-U6-tW01 | This study |
| PBB299 | pSGDluc_UGG-ACP2-2-U6-tW01 | This study |
| PBB298 | pSGDluc_UGA-ACP2-2-U6-tY01 | This study |
| PBB300 | pSGDluc_UGG-ACP2-2-U6-tY01 | This study |
| GL3107 | pSGDluc_UGA-C              | (2)        |
| GL3108 | pSGDluc_UGG-C              | (2)        |
| HR4    | pSGDluc_UGA-C-U6-tW01      | This study |
| HR12   | pSGDluc_UGG-C-U6-tW01      | This study |
| HR5    | pSGDluc_UGA-C-U6-tY01      | This study |
| HR13   | pSGDluc_UGG-C-U6-tY01      | This study |
| PBB271 | p2luci-Sindbis_UGG-U6      | This study |
| PBB272 | p2luci-Sindbis_UGA-U6      | This study |
| PBB273 | p2luci-CTFV_UGG-U6         | This study |
| PBB274 | p2luci-CTFV_UGA-U6         | This study |
| PBB275 | p2luci-Sindbis_UGG-U6-tW   | This study |
| PBB276 | p2luci-Sindbis_UGA-U6-tW   | This study |
| PBB277 | p2luci-CTFV_UGG-U6-tW      | This study |
| PBB278 | p2luci-CTFV_UGA-U6-tW      | This study |
| PBB219 | p2luci-UGA-CTAG-U6         | This study |
| PBB234 | p2luci-CAG-CTAG-U6         | This study |
| PBB223 | p2luci-UGA-CTAG-U6-tW01    | This study |
| PBB235 | p2luci-CAG-CTAG-U6-tW01    | This study |
| PBB301 | p53BS-luci_U6-tW01-Smal-a  | This study |
| PBB321 | p53BS-luci                 | (3)        |



|        |                              |            |
|--------|------------------------------|------------|
| PBB394 | pCMV-LacZ                    | (3)        |
| PBB395 | pCMV-p53-WT                  | (3)        |
| PBB406 | pCMV-p53-W53UAG              | (3)        |
| PBB407 | pCMV-p53-W53UGA              | This study |
| PBB400 | pCMV-p53-W146UGA             | This study |
| PBB330 | p53BS-luci_2x_U6-tW01-SmaI-a | This study |
| PBB332 | p53BS-luci-U6-tY01           | This study |
| PBB375 | tet-U6-tW01                  | Invitrogen |
| PBB380 | pSGDluc_UGA-MDH1-tetU6-tW01  | This study |
| PBB382 | pSGDluc_UGG-MDH1-tetU6-tW01  | This study |

**Table S2.** Primers used in this study.

| <b>Primer name</b> | <b>Primer sequence (5' to 3')</b>                                                                        |
|--------------------|----------------------------------------------------------------------------------------------------------|
| PB159              | ATGGCCAAAGGTCGGGCAGGAAGAG                                                                                |
| PB160              | AGGTACCACGCGTGGGCCCGGTGTTTCGTCCTTTCCA<br>C                                                               |
| PB162              | AATAAGGGCCCCCTTCGATAGCTCAGCTGGTAGAGCGG<br>AGGACTGTAGATCCTTAGGtCGCTGGTTCGATTCCGGCT<br>CGAAGGAGGTACCAATAA  |
| PB167              | TTATTGGTACCTCCTTCGAGCCGGAATCGAACCAGCGA<br>CCTAAGGATCTACAGTCCTCCGCTCTACCAGCTGAGCT<br>ATCGAAGGGGGCCCTTATT  |
| PB164              | AATAAGGGCCCCGGTTCATGGTGTAATGGTTAGCACTC<br>TGGACTCTGAATCCAGCGATCCGAGTTCAAATCTCGGT<br>GGAACCTGGTACCAATAA   |
| PB169              | TTATTGGTACCAGGTTCCACCGAGATTTGAACTCGGATC<br>GCTGGATTCAGAGTCCAGAGTGCTAACCATTACACCAT<br>GGAACCGGGCCCTTATT   |
| PB166              | AATAAGGGCCCCGGTTCATGGTGTAATGGTTAGCACTC<br>TGGACTCTAAATCCAGCGATCCGAGTTCAAATCTCGGT<br>GGAACCTGGTACCAATAA   |
| PB171              | TTATTGGTACCAGGTTCCACCGAGATTTGAACTCGGATC<br>GCTGGATTTAGAGTCCAGAGTGCTAACCATTACACCAT<br>GGAACCGGGCCCTTATT   |
| PB177              | AATAAGGGCCCCGACCTCGTGGCGCAACGGTAGCGCGT<br>CTGACTCCAGATCAGAAGGCTGCGTGTTTCGAATCACGT<br>CGGGGTCAGGTACCAATAA |
| PB178              | TTATTGGTACCTGACCCCGACGTGATTCGAACACGCAG<br>CCTTCTGATCTGGAGTCAGACGCGCTACCGTTGCGCCA<br>CGAGGTTCGGGCCCTTATT  |
| PB175              | AATAAGGGCCCCCTTCAATAGTTCAGCTGGTAGAGCAG<br>AGGACTATAGGTCCTTAGGTTGCTGGTTCGATTCCAGC<br>TTGAAGGAGGTACCAATAA  |
| PB176              | TTATTGGTACCTCCTTCAAGCTGGAATCGAACCAGCAAC<br>CTAAGGACCTATAGTCCTCTGCTCTACCAGCTGAACTAT<br>TGAAGGGGGCCCTTATT  |
| PB43               | CTCGAAGCGGCCGCTCTAGAATTACAC                                                                              |
| PB187              | CAAATGTCGACGTGCGATCAGCTAGTCGGATCCTTCAA<br>CTTCCCTGAGCTCG                                                 |
| PB212              | CGATATTGAACAATGATTCAGTGAAGACCCA                                                                          |
| PB213              | TGGGTCTTCAGTGAATCATTGTTCAATATCG                                                                          |
| PB216              | CCCTGTGCAGCTGTGAGTTGATTCCACACCC                                                                          |
| PB217              | GGGTGTGGAATCAACTCACAGCTGCACAGGG                                                                          |
| WARS_qPCR-f        | GCTCATTGTTTCGGTTTGGGA                                                                                    |

|              |                          |
|--------------|--------------------------|
| WARS_qPCR-r  | GAAGTGGTGTGGTCTTTGG      |
| YARS_qPCR-f  | CTGAGGTGGTAAAGCAGGT      |
| YARS_qPCR-r  | AATACTCTTCATCCAAAGCCTG   |
| eRF1_qPCR-f  | GGTCTGGTTGTATACTGTGG     |
| eRF1_qPCR-r  | TGTAAGAGCCTCTGTATGGA     |
| 18S_qPCR-f   | CCGCAGCTAGGAATAATG       |
| 18S_qPCR-r   | CCGGTCCAAGAATTTAC        |
| ALAS_qPCR-f  | CCACTGGAAGAGCTGTGTGATGTG |
| ALAS_qPCR-r  | GCGATGTACCCTCCAACACAACC  |
| SPIKE_qPCR-f | CGAAATGAGAGCCAAGTGG      |
| SPIKE_qPCR-r | ATGCAATTTAGATCCATTATGAGG |

**Table S3.** Genestrings (GeneArt™ Strings™ DNA Fragments by Invitrogen) used in this study.

| Name | DNA sequence (5' to 3')                                                                                                                                                                                                                                                                                                                                                                                                                                                                                  |
|------|----------------------------------------------------------------------------------------------------------------------------------------------------------------------------------------------------------------------------------------------------------------------------------------------------------------------------------------------------------------------------------------------------------------------------------------------------------------------------------------------------------|
| SG1  | GTTCTCAAAAATGAACAAATGTCGACGTA CTGGGTAAGGTGGGTACATATTTTCGACGGACACAGGCC<br>CTGGGCACTTGCAAAGAAGTCCGTTCTGCAGAACCAG<br>CTTACAGAACCGACCTTGGAGCGCAATGTCCTGGAAAG<br>AATTCATGCCCGGTGCTCGACACGTGAAAGAGGAAC<br>AACTCAAACCTCAGGTACCAGATGATGCCACCGAAGCC<br>AACAAAAGTAGGTACGGATCCTTCAACTTCCCTGAGCT<br>CGAAGACGCCAAAAACATAAAG                                                                                                                                                                                           |
| SG2  | GTTCTCAAAAATGAACAAATGTCGACGTA CTGGGTAAGGTGGGTACATATTTTCGACGGACACAGGCC<br>CTGGGCACTTGCAAAGAAGTCCGTTCTGCAGAACCAG<br>CTTACAGAACCGACCTTGGAGCGCAATGTCCTGGAAAG<br>AATTCATGCCCGGTGCTCGACACGTGAAAGAGGAAC<br>AACTCAAACCTCAGGTACCAGATGATGCCACCGAAGCC<br>AACAAAAGTAGGTACGGATCCTTCAACTTCCCTGAGCT<br>CGAAGACGCCAAAAACATAAAG                                                                                                                                                                                           |
| SG3  | GTTCTCAAAAATGAACAAATGTCGACGTGTTGGCGGTG<br>TTGGCCTGGTGAGCTGTACCTCATTAACATCGAGAGTG<br>CAGGCTTTCGTGAAGGAGCTTCAGCGGCTGCGGCTTAC<br>CAGGCGGGCTTTTTGCGTGGATCCTTCAACTTCCCTGA<br>GCTCGAAGACGCCAAAAACATAAAG                                                                                                                                                                                                                                                                                                        |
| SG4  | GTTCTCAAAAATGAACAAATGTCGACGTGTTGACGGTGT<br>TGGCCTGGTGAGCTGTACCTCATTAACATCGAGAGTGC<br>AGGCTTTCGTGAAGGAGCTTCAGCGGCTGCGGCTTACC<br>AGGCGGGCTTTTTGCGTGGATCCTTCAACTTCCCTGAG<br>CTCGAAGACGCCAAAAACATAAAG                                                                                                                                                                                                                                                                                                        |
| SG7  | CTGATAAATGCTTCAATAATAGTTTAAACGGATCCTGGC<br>CAAAGGTCGGGCAGGAAGAGGGCCTATTTCCCATGATT<br>CCTTCATATTTGCATATACGATACAAGGCTGTTAGAGAG<br>ATAATTGGAATTAATTTGACTGTAAACACAAAGATATTAG<br>TACAAAATACGTGACGTAGAAAGTAATAATTTCTTGGGT<br>AGTTTGCAGTTTTAAATTAATGTTTTAAATGGACTATCA<br>TATGCTTACCGTAACTTGAAAGTATTTGATTTCTTGGC<br>TTTATATATCTTGTGGAAAGGACGAAACACCGGGGCC<br>GACCTCGTGGCGAACGGTAGCGCGTCTGACTCCAGA<br>TCAGAAGGCTGCGTGTTTGAATCACGTGCGGGTTCAGGT<br>ACCTATTGAAAAATTTTTGGAACCGGGGTGACGTTT<br>AACTATTGAAAAAGGAAGAGTATG |
| SG8  | CTGATAAATGCTTCAATAATAGTTTAAACGGATCCTGGC<br>CAAAGGTCGGGCAGGAAGAGGGCCTATTTCCCATGATT                                                                                                                                                                                                                                                                                                                                                                                                                        |

|      |                                                                                                                                                                                                                                                                                                                                                                                                                                                                                                                                                |
|------|------------------------------------------------------------------------------------------------------------------------------------------------------------------------------------------------------------------------------------------------------------------------------------------------------------------------------------------------------------------------------------------------------------------------------------------------------------------------------------------------------------------------------------------------|
|      | <p>CCTTCATATTTGCATATACGATACAAGGCTGTTAGAGAG<br/> ATAATTGGAATTAATTTGACTGTAAACACAAAGATATTAG<br/> TACAAAATACGTGACGTAGAAAGTAATAATTTCTTGGGT<br/> AGTTTGCAGTTTTAAAATTATGTTTTAAAATGGACTATCA<br/> TATGCTTACCGTAACTTGAAAGTATTTTCGATTTCTTGGC<br/> TTTATATATCTTGTGGAAAGGACGAAACACCGGGGCC<br/> CCTTCGATAGCTCAGCTGGTAGAGCGGAGGACTGTAGA<br/> TCCTTAGGTCGCTGTTTCGATTCCGGCTCGAAGGAGGT<br/> ACCTATTGAAAAATTTTTTGAACCCGGGGTTCGACGTTT<br/> AACTATTGAAAAAGGAAGAGTATG</p>                                                                                            |
| SG9  | <p>CTGATAAATGCTTCAATAATAGTTTTAAACGGATCCTGGC<br/> CAAAGGTCGGGCAGGAAGAGGGCCTATTTCCCATGATT<br/> CCTTCATATTTGCATATACGATACAAGGCTGTTAGAGAG<br/> ATAATTGGAATTAATTTGACTGTAAACACAAAGATATTAG<br/> TACAAAATACGTGACGTAGAAAGTAATAATTTCTTGGGT<br/> AGTTTGCAGTTTTAAAATTATGTTTTAAAATGGACTATCA<br/> TATGCTTACCGTAACTTGAAAGTATTTTCGATTTCTTGGC<br/> TTTATATATCTTGTGGAAAGGACGAAACACCGGGGCC<br/> GACCTCGTGGCGCAACGGTAGCGCGTCTGACTCCAGA<br/> TCAGAAGGTTGCGTGTTCAAATCACGTCGGGGTTCAGGT<br/> ACCTATTGAAAAATTTTTTGAACCCGGGGTTCGACGTTT<br/> AACTATTGAAAAAGGAAGAGTATG</p>  |
| SG10 | <p>CTGATAAATGCTTCAATAATAGTTTTAAACGGATCCTGGC<br/> CAAAGGTCGGGCAGGAAGAGGGCCTATTTCCCATGATT<br/> CCTTCATATTTGCATATACGATACAAGGCTGTTAGAGAG<br/> ATAATTGGAATTAATTTGACTGTAAACACAAAGATATTAG<br/> TACAAAATACGTGACGTAGAAAGTAATAATTTCTTGGGT<br/> AGTTTGCAGTTTTAAAATTATGTTTTAAAATGGACTATCA<br/> TATGCTTACCGTAACTTGAAAGTATTTTCGATTTCTTGGC<br/> TTTATATATCTTGTGGAAAGGACGAAACACCGGGGCC<br/> GACCTCGTGGCGCAATGGTAGCGCGTCTGACTCCAGAT<br/> CAGAAGGTTGCGTGTTCAAGTCACGTCGGGGTTCAGGTA<br/> CCTATTGAAAAATTTTTTGAACCCGGGGTTCGACGTTTA<br/> AACTATTGAAAAAGGAAGAGTATG</p> |
| SG11 | <p>CTGATAAATGCTTCAATAATAGTTTTAAACGGATCCTGGC<br/> CAAAGGTCGGGCAGGAAGAGGGCCTATTTCCCATGATT<br/> CCTTCATATTTGCATATACGATACAAGGCTGTTAGAGAG<br/> ATAATTGGAATTAATTTGACTGTAAACACAAAGATATTAG<br/> TACAAAATACGTGACGTAGAAAGTAATAATTTCTTGGGT<br/> AGTTTGCAGTTTTAAAATTATGTTTTAAAATGGACTATCA<br/> TATGCTTACCGTAACTTGAAAGTATTTTCGATTTCTTGGC<br/> TTTATATATCTTGTGGAAAGGACGAAACACCGGGGCC<br/> GGCCTCGTGGCGCAACGGTAGCGCGTCTGACTCCAGA</p>                                                                                                                          |

|      |                                                                                                                                                                                                                                                                                                                                                                                                                                                                                                                                             |
|------|---------------------------------------------------------------------------------------------------------------------------------------------------------------------------------------------------------------------------------------------------------------------------------------------------------------------------------------------------------------------------------------------------------------------------------------------------------------------------------------------------------------------------------------------|
|      | TCAGAAGGTTGCGTGTTCAAATCACGTCGGGGTCAGGT<br>ACCTATTGAAAAATTTTTTGAACCCGGGGTCGACGTTT<br>AAACTATTGAAAAAGGAAGAGTATG                                                                                                                                                                                                                                                                                                                                                                                                                               |
| SG12 | CTGATAAATGCTTCAATAATAGTTTAAACGGATCCTGGC<br>CAAAGGTCGGGCAGGAAGAGGGCCTATTTCCCATGATT<br>CCTTCATATTTGCATATACGATACAAGGCTGTTAGAGAG<br>ATAATTGGAATTAATTTGACTGTAAACACAAAGATATTAG<br>TACAAAATACGTGACGTAGAAAGTAATAATTTCTTGGGT<br>AGTTTGCAGTTTTAAAATTATGTTTTAAAATGGACTATCA<br>TATGCTTACCGTAACTTGAAAGTATTTTCGATTTCTTGGC<br>TTTATATATCTTGTGGAAAGGACGAAACACCGGGGCC<br>GACCTCGTGGCGCAACGGCAGCGCTCTGACTCCAGA<br>TCAGAAGGTTGCGTGTTCAAATCACGTCGGGGTCAGGT<br>ACCTATTGAAAAATTTTTTGAACCCGGGGTCGACGTTT<br>AAACTATTGAAAAAGGAAGAGTATG                               |
| SG13 | CTGATAAATGCTTCAATAATAGTTTAAACGGATCCTGGC<br>CAAAGGTCGGGCAGGAAGAGGGCCTATTTCCCATGATT<br>CCTTCATATTTGCATATACGATACAAGGCTGTTAGAGAG<br>ATAATTGGAATTAATTTGACTGTAAACACAAAGATATTAG<br>TACAAAATACGTGACGTAGAAAGTAATAATTTCTTGGGT<br>AGTTTGCAGTTTTAAAATTATGTTTTAAAATGGACTATCA<br>TATGCTTACCGTAACTTGAAAGTATTTTCGATTTCTTGGC<br>TTTATATATCTTGTGGAAAGGACGAAACACCGGGGCC<br>GGCAGAGGAGGGTGCAGTTGGCAGCCTGTCCAAGTCC<br>AGCACGGTTGGAGCACAGGATTTAGAATGGGATGGTCC<br>TGGGTTCAAACCCAGCTGCGCCCGGTACCTATTGAAA<br>AATTTTTTGAACCCGGGGTCGACGTTTAACTATTGAA<br>AAAGGAAGAGTATG |
| SG14 | CTGATAAATGCTTCAATAATAGTTTAAACGGATCCTGGC<br>CAAAGGTCGGGCAGGAAGAGGGCCTATTTCCCATGATT<br>CCTTCATATTTGCATATACGATACAAGGCTGTTAGAGAG<br>ATAATTGGAATTAATTTGACTGTAAACACAAAGATATTAG<br>TACAAAATACGTGACGTAGAAAGTAATAATTTCTTGGGT<br>AGTTTGCAGTTTTAAAATTATGTTTTAAAATGGACTATCA<br>TATGCTTACCGTAACTTGAAAGTATTTTCGATTTCTTGGC<br>TTTATATATCTTGTGGAAAGGACGAAACACCGGGGCC<br>GGAAGGATGGGGCCAAGCTGGAAAGCCTGTGGGCTCC<br>ACAGTCATGTGCCTGGGTTCAATTTCCAGTTCTGCATG<br>GTACCTATTGAAAAATTTTTTGAACCCGGGGTCGACGT<br>TTAACTATTGAAAAAGGAAGAGTATG                             |
| SG16 | CTGATAAATGCTTCAATAATAGTTTAAACGGATCCTGGC<br>CAAAGGTCGGGCAGGAAGAGGGCCTATTTCCCATGATT<br>CCTTCATATTTGCATATACGATACAAGGCTGTTAGAGAG                                                                                                                                                                                                                                                                                                                                                                                                                |

|      |                                                                                                                                                                                                                                                                                                                                                                                                                                                                                                                  |
|------|------------------------------------------------------------------------------------------------------------------------------------------------------------------------------------------------------------------------------------------------------------------------------------------------------------------------------------------------------------------------------------------------------------------------------------------------------------------------------------------------------------------|
|      | ATAATTGGAATTAATTTGACTGTAAACACAAAGATATTAG<br>TACAAAATACGTGACGTAGAAAGTAATAATTTCTTGGGT<br>AGTTTGCAGTTTTAAAATTATGTTTTAAAATGGACTATCA<br>TATGCTTACCGTAACTTGAAAGTATTTTCGATTTCTTGGC<br>TTTATATATCTTGTGGAAAGGACGAAACACCGGGGCC<br>CCTTCGATAGCTCAGCTGGTAGAGCGGAGGACTGTAGA<br>TCCTTAGGTCGCTGGTTCGATTCCAGCTCGAAGGAGGT<br>ACCTATTGAAAAATTTTTTGAACCCGGGGTTCGACGTTT<br>AAACTATTGAAAAAGGAAGAGTATG                                                                                                                                 |
| SG17 | CTGATAAATGCTTCAATAATAGTTTAAACGGATCCTGGC<br>CAAAGGTCGGGCAGGAAGAGGGCCTATTTCCCATGATT<br>CCTTCATATTTGCATATACGATACAAGGCTGTTAGAGAG<br>ATAATTGGAATTAATTTGACTGTAAACACAAAGATATTAG<br>TACAAAATACGTGACGTAGAAAGTAATAATTTCTTGGGT<br>AGTTTGCAGTTTTAAAATTATGTTTTAAAATGGACTATCA<br>TATGCTTACCGTAACTTGAAAGTATTTTCGATTTCTTGGC<br>TTTATATATCTTGTGGAAAGGACGAAACACCGGGGCC<br>CCTTCGATAGCTCAGTTGGTAGAGCGGAGGACTGTAGA<br>TCCTTAGGTCGCTGGTTCGATTCCGGCTCGAAGGAGGT<br>ACCTATTGAAAAATTTTTTGAACCCGGGGTTCGACGTTT<br>AAACTATTGAAAAAGGAAGAGTATG |
| SG18 | CTGATAAATGCTTCAATAATAGTTTAAACGGATCCTGGC<br>CAAAGGTCGGGCAGGAAGAGGGCCTATTTCCCATGATT<br>CCTTCATATTTGCATATACGATACAAGGCTGTTAGAGAG<br>ATAATTGGAATTAATTTGACTGTAAACACAAAGATATTAG<br>TACAAAATACGTGACGTAGAAAGTAATAATTTCTTGGGT<br>AGTTTGCAGTTTTAAAATTATGTTTTAAAATGGACTATCA<br>TATGCTTACCGTAACTTGAAAGTATTTTCGATTTCTTGGC<br>TTTATATATCTTGTGGAAAGGACGAAACACCGGGGCC<br>CCTTCGATAGCTCAGTTGGTAGAGCGGAGGACTGTAGA<br>TCCTTAGGTCGCTGGTTCGAATCCGGCTCGAAGGAGGT<br>ACCTATTGAAAAATTTTTTGAACCCGGGGTTCGACGTTT<br>AAACTATTGAAAAAGGAAGAGTATG |
| SG19 | CTGATAAATGCTTCAATAATAGTTTAAACGGATCCTGGC<br>CAAAGGTCGGGCAGGAAGAGGGCCTATTTCCCATGATT<br>CCTTCATATTTGCATATACGATACAAGGCTGTTAGAGAG<br>ATAATTGGAATTAATTTGACTGTAAACACAAAGATATTAG<br>TACAAAATACGTGACGTAGAAAGTAATAATTTCTTGGGT<br>AGTTTGCAGTTTTAAAATTATGTTTTAAAATGGACTATCA<br>TATGCTTACCGTAACTTGAAAGTATTTTCGATTTCTTGGC<br>TTTATATATCTTGTGGAAAGGACGAAACACCGGGGCC<br>TCTTCAATAGCTCAGCTGGTAGAGCGGAGGACTGTAGA<br>TTCTTAGGTGCTGGTTTGATTCCGACTTGGAGAGGGTA                                                                         |

|      |                                                                                                                                                                                                                                                                                                                                                                                                                                                                                                             |
|------|-------------------------------------------------------------------------------------------------------------------------------------------------------------------------------------------------------------------------------------------------------------------------------------------------------------------------------------------------------------------------------------------------------------------------------------------------------------------------------------------------------------|
|      | CCTATTGAAAAATTTTTTGAACCCGGGGTTCGACGTTTAACTATTGAAAAAGGAAGAGTATG                                                                                                                                                                                                                                                                                                                                                                                                                                              |
| SG20 | CTGATAAATGCTTCAATAATAGTTTAAACGGATCCTGGC<br>CAAAGGTCGGGCAGGAAGAGGGCCTATTTCCCATGATT<br>CCTTCATATTTGCATATACGATACAAGGCTGTTAGAGAG<br>ATAATTGGAATTAATTTGACTGTAAACACAAAGATATTAG<br>TACAAAATACGTGACGTAGAAAGTAATAATTTCTTGGGT<br>AGTTTGCAGTTTTAAATTATGTTTTAAATGGACTATCA<br>TATGCTTACCGTAACTTGAAAGTATTTTCGATTTCTTGGC<br>TTTATATATCTTGTGGAAAGGACGAAACACCGGGGCC<br>CCTTCGATAGCTCAGCTGGTAGAGCGGAGGACTGTAGA<br>TCCTTAGGTCGCTGGTTCAATTCCGGCTCGAAGGAGGT<br>ACCTATTGAAAAATTTTTTGAACCCGGGGTTCGACGTTTAACTATTGAAAAAGGAAGAGTATG   |
| SG21 | CTGATAAATGCTTCAATAATAGTTTAAACGGATCCTGGC<br>CAAAGGTCGGGCAGGAAGAGGGCCTATTTCCCATGATT<br>CCTTCATATTTGCATATACGATACAAGGCTGTTAGAGAG<br>ATAATTGGAATTAATTTGACTGTAAACACAAAGATATTAG<br>TACAAAATACGTGACGTAGAAAGTAATAATTTCTTGGGT<br>AGTTTGCAGTTTTAAATTATGTTTTAAATGGACTATCA<br>TATGCTTACCGTAACTTGAAAGTATTTTCGATTTCTTGGC<br>TTTATATATCTTGTGGAAAGGACGAAACACCGGGGCC<br>GGGGGTATAGCTCAGGGCTAGAGCTTTTTGACTGTAGA<br>GCAAGAGGTCCCTGGTTCAATCCAGGTTCTCCCTGGT<br>ACCTATTGAAAAATTTTTTGAACCCGGGGTTCGACGTTTAACTATTGAAAAAGGAAGAGTATG    |
| SG22 | CTGATAAATGCTTCAATAATAGTTTAAACGGATCCTGGC<br>CAAAGGTCGGGCAGGAAGAGGGCCTATTTCCCATGATT<br>CCTTCATATTTGCATATACGATACAAGGCTGTTAGAGAG<br>ATAATTGGAATTAATTTGACTGTAAACACAAAGATATTAG<br>TACAAAATACGTGACGTAGAAAGTAATAATTTCTTGGGT<br>AGTTTGCAGTTTTAAATTATGTTTTAAATGGACTATCA<br>TATGCTTACCGTAACTTGAAAGTATTTTCGATTTCTTGGC<br>TTTATATATCTTGTGGAAAGGACGAAACACCGGGGCC<br>TCAATTATAGCTCAGTGGTAGAGCATTAACTGTAGATC<br>AAGAGGTCCCTGGATCAACTCTGGGTGCCCCCTTTAAG<br>GTACCTATTGAAAAATTTTTTGAACCCGGGGTTCGACGTTTAACTATTGAAAAAGGAAGAGTATG |
| SG23 | CTGATAAATGCTTCAATAATAGTTTAAACGGATCCTGGC<br>CAAAGGTCGGGCAGGAAGAGGGCCTATTTCCCATGATT<br>CCTTCATATTTGCATATACGATACAAGGCTGTTAGAGAG<br>ATAATTGGAATTAATTTGACTGTAAACACAAAGATATTAG<br>TACAAAATACGTGACGTAGAAAGTAATAATTTCTTGGGT                                                                                                                                                                                                                                                                                         |



|      |                                                                                                                                                                                                                                                                                                                                                                                                                                                                                                                  |
|------|------------------------------------------------------------------------------------------------------------------------------------------------------------------------------------------------------------------------------------------------------------------------------------------------------------------------------------------------------------------------------------------------------------------------------------------------------------------------------------------------------------------|
|      | AGTTTGCAGTTTTAAAATTATGTTTTAAAATGGACTATCA<br>TATGCTTACCGTAACTTGAAAGTATTTTCGATTTCTTGGC<br>TTTATATATCTTGTGGAAAGGACGAAACACCGGGGCC<br>GTCAGTGTTCACAACGGTTAAGTGAAGAGGCTGTAAA<br>CCCAGACTGGATGGGTTCATTCCCATCTCTGCCGGGT<br>ACCTATTGAAAAATTTTTTGAACCCGGGGTTCGACGTTT<br>AACTATTGAAAAAGGAAGAGTATG                                                                                                                                                                                                                           |
| SG24 | CTGATAAATGCTTCAATAATAGTTTTAAACGGATCCTGGC<br>CAAAGGTCGGGCAGGAAGAGGGCCTATTTCCCATGATT<br>CCTTCATATTTGCATATACGATACAAGGCTGTTAGAGAG<br>ATAATTGGAATTAATTTGACTGTAAACACAAAGATATTAG<br>TACAAAATACGTGACGTAGAAAGTAATAATTTCTTGGGT<br>AGTTTGCAGTTTTAAAATTATGTTTTAAAATGGACTATCA<br>TATGCTTACCGTAACTTGAAAGTATTTTCGATTTCTTGGC<br>TTTATATATCTTGTGGAAAGGACGAAACACCGGGGCC<br>CTTTCGATAGCTCAGTTGGTAGAGCGGAGGACTGTAGA<br>TCCTTAGGTCGCTGGTTCGAATCCGGCTCGAAGGAGGT<br>ACCTATTGAAAAATTTTTTGAACCCGGGGTTCGACGTTT<br>AACTATTGAAAAAGGAAGAGTATG |
| SG25 | CTGATAAATGCTTCAATAATAGTTTTAAACGGATCCTGGC<br>CAAAGGTCGGGCAGGAAGAGGGCCTATTTCCCATGATT<br>CCTTCATATTTGCATATACGATACAAGGCTGTTAGAGAG<br>ATAATTGGAATTAATTTGACTGTAAACACAAAGATATTAG<br>TACAAAATACGTGACGTAGAAAGTAATAATTTCTTGGGT<br>AGTTTGCAGTTTTAAAATTATGTTTTAAAATGGACTATCA<br>TATGCTTACCGTAACTTGAAAGTATTTTCGATTTCTTGGC<br>TTTATATATCTTGTGGAAAGGACGAAACACCGGGGCC<br>CCTTCGATAGCTCAGTTGGTAGAGCGGAGGACTGTAGA<br>TCCTTAGGTCGCTGGTTCGAATCCGGCTCGGAGGAGGT<br>ACCTATTGAAAAATTTTTTGAACCCGGGGTTCGACGTTT<br>AACTATTGAAAAAGGAAGAGTATG |
| SG26 | CTGATAAATGCTTCAATAATAGTTTTAAACGGATCCTGGC<br>CAAAGGTCGGGCAGGAAGAGGGCCTATTTCCCATGATT<br>CCTTCATATTTGCATATACGATACAAGGCTGTTAGAGAG<br>ATAATTGGAATTAATTTGACTGTAAACACAAAGATATTAG<br>TACAAAATACGTGACGTAGAAAGTAATAATTTCTTGGGT<br>AGTTTGCAGTTTTAAAATTATGTTTTAAAATGGACTATCA<br>TATGCTTACCGTAACTTGAAAGTATTTTCGATTTCTTGGC<br>TTTATATATCTTGTGGAAAGGACGAAACACCGGGGCC<br>CCTTCGATAGCTCAGCTGGTAGAGCGGAGGACTGTAGA<br>TCCTTAGGTCGCTGGTTCGAATCCGGCTCGGAGGAGGT<br>ACCTATTGAAAAATTTTTTGAACCCGGGGTTCGACGTTT<br>AACTATTGAAAAAGGAAGAGTATG |

## SUPPLEMENTARY FIGURES AND FIGURE LEGENDS

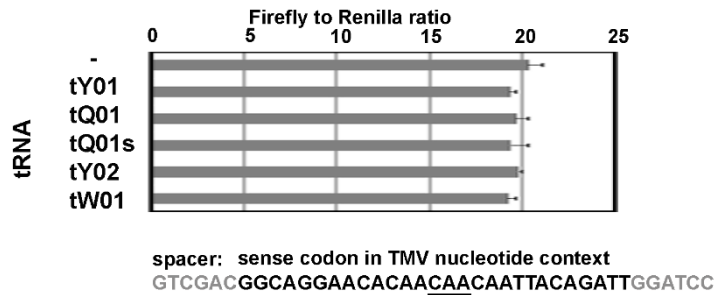

**Supplementary Figure 1. Overexpression of human tRNAs do not affect Firefly to Renilla ratio for a reporter bearing the sense codon (CAA).** The HEK293T cells were transfected with sense codon control reporters containing the U6-tRNAbox with or without indicated tRNAs and processed for luciferase activity measurements as described in Materials and Methods.

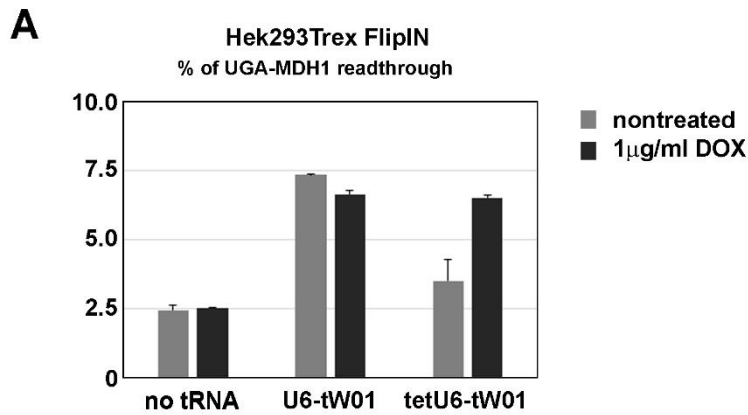

**B**

```

1  ctgataaatg cttcaataat agtttaaacg gatcctggcc aaaggtcggg caggaagagg gctatattcc catgatttcc tcataatttcg atatacgata
   gactatttac gaagttatta tcaaatttgc ctaggaccgg ttocagcccc gtccttctcc cggataaagg gtaactaagg agtataaacg tatatgcat

101 caaggctggt agagagataa ttggaattaa ttgactgta aacacaaaga tattagtaca aaatacgtga cgtagaaagt aataattttc tgggtagttt
   gttccgacaa tctctctatt aaccttaatt aaactgacat ttgtgtttct ataatoatgt tttatgcaat gcacttttca ttattaaaga accoatcaaa

201 gcagttttaa aattatggtt taaatggac tatcatatgc ttaccgtaac tgaaagtcc ctatcagtga tagagattat atatctccct atcagtgata
   cgtcaaaatt ttaatacaaa attttacctg atagtatacg aatggcattg aacttccagg gatagtcact atctctaata tatagagga tagtcaactat
                                     PSE O2 TATA O2

301 gagaccggg cccgaacctg tgggccaacg gtagcgctc tgactcaga tcagaaggct gcgtgttga atcacgtcg ggtoaggtac ctattgaaaa
   ctctgggccc gggctggagc accgcttg catcggcag actgaggtct agtcttccga cgcacaagct tagtgcagcc ccagtccatg gataactttt
   +1 tW01

401 attttttgga acccggggtc gacgtttaa ctattgaaaa aggaagagta tg
   taaaaaacct tgggcccag ctgcaaattt gataactttt tcttctcat ac

```

**Supplementary Figure 2. Doxycycline inducible TetU6-tW01 expression in HEK293Trex cells increases SC-RT of the UGA-MDH1 reporter. (A)** Readthrough measurements using UGA-MDH1 reporter with no tRNA control (no tRNA) and tryptophan tRNA under either the U6 promoter (U6-tW01) or the doxycycline inducible U6 promoter (tetU6-tW01) in the Hek293Trex FlipIN cells. The cells were transfected with stop codon constructs (GL3101, PBB371, PBB380) or their respective sense codon controls (GL3102, PBB373, PBB382) and treated with or without doxycycline 16h prior the readthrough measurement. **(B)** The sequence of tetU6-tW01 cassette including the U6 promoter features as in Figure 1 with insertions of two O2 repressor binding sequences and tW01 tryptophan tRNA. The PSE, TATAbox, +1 position, tRNA and O2 sequences are indicated in red.



polymorphism. (C) The UAG–TMV context readthrough measurements with overexpression of the indicated Tyr tRNA iso-decoders under control of U6 in PBB168 (for UAG) or its sense control PBB172.

**A**

```

> tY01 Homo_sapiens_chr14.trna16-TyrGTA _ Tyr (GTA) 94 bp Sc: 74.71
CCTTCGATAGCTCAGCTGGTAGAGCGGAGGACTGTAGATCCTTAGGTCGCTGGTTCGATTCCGGCTCGAAGGA

> tY06 Homo_sapiens_chr8.trna12-TyrGTA _ Tyr (GTA) 88 bp Sc: 46.11
TCTTCAATAGCTCAGCTGGTAGAGCGGAGGACTGTAGATTCTTAGGT_GCTGGTTTGATTCCGACTTGGAGAG

> tY08 Homo_sapiens_chr7.trna9-TyrGTA _ Tyr (GTA) 73 bp Sc: 49.38
GGGGGTATAGCTCAGGGCTAGAGCTTTTGTACTGTAGAGCAAGAGGTCCTGGTTCAAATCCAGGTTCTCCCT

> tY09 Homo_sapiens_chr7.trna24-TyrGTA _ Tyr (GTA) 76 bp Sc: 33.50
TCAATTATAGCTCAGTGGTAGAGCATTAACTGTAGATCAAGAGGTCCTGGATCAACTCTGGGTGCCCCCTTT
AA

> tY10 Homo_sapiens_chr15.trna5-TyrGTA _ Tyr (GTA) 73 bp Sc: 24.21
GTCAGTGTGCACAACGGTTAAGTGAAGAGGCTGTAAACCCAGACTGGATGGGTTCAAATCCCATCTCTGCCG

```

**B**

```

> tY01 CCTTCGATAGCTCAGCTGGTAGAGCGGAGGACTGTAGATCCTTAGGTCGCTGGTTCGATTCCGGCTCGAAGGA
> tY06 TCTTCAATAGCTCAGCTGGTAGAGCGGAGGACTGTAGATTCTTAGGTXGCTGGTTTGATTCCGACTTGGAGAG
> tY08 GGGGGTATAGCTCAGGGCTAGAGCTTTTGTACTGTAGAGCAAGAGGTCCTGGTTCAAATCCAGGTTCTCCCT
> tY09 TCAATTATAGCTCAGTGGTAGAGCATTAACTGTAGATCAAGAGGTCCTGGATCAACTCTGGGTGCCCCCTTTAA
> tY10 GTCAGTGTGCACAACGGTTAAGTGAAGAGGCTGTAAACCCAGACTGGATGGGTTCAAATCCCATCTCTGCCG

```

**C**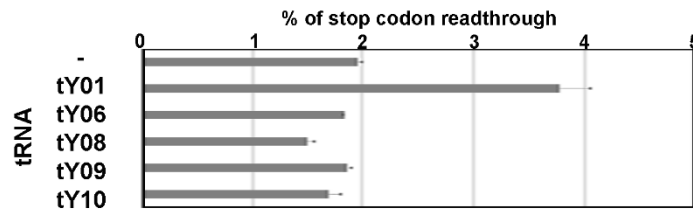

**Supplementary Figure 4. Bioinformatically predicted “low tRNA score” tyrosine tRNA pseudogenes do not increase UAG readthrough.** (A) tY01 and four other tyrosine tRNA sequences retrieved from the GtRNAdb (4,5) (deprived of their computationally predicted introns) that were experimentally shown not to increase the UAG readthrough. (B) The ClustalX2 alignment of the tRNA sequences from panel A and a high tRNA score tY01. (C) The UAG–TMV context readthrough measurements with overexpression of tY01 and the indicated Tyr tRNA pseudogenes under control of U6 in PBB168 (for UAG) or its sense control PBB172.

**A**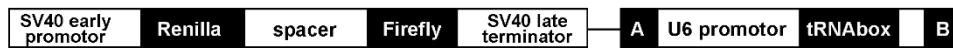**B**

| tRNA                                                                                   | >gene name<br>sequence                                                                                             | % of UAG<br>readthrough |
|----------------------------------------------------------------------------------------|--------------------------------------------------------------------------------------------------------------------|-------------------------|
| -                                                                                      | none                                                                                                               | 1.96 ± 0.03             |
|  tY01 | >Homo_sapiens_chr14.trna16-TyrGTA<br>CCTTCGATAGCTCAGCTGGTAGAGCGGAGGACTGTA<br>GATCCTTAGGTCGCTGGTTCGATTCCGGCTCGAAGGA | 3.61 ± 0.11             |
|  tY02 | >Homo_sapiens_chr2.trna14-TyrATA<br>CCTTCAATAGTTCAGCTGGTAGAGCAGAGGACTATA<br>GGTCCTTAGGTTGCTGGTTCGATTCCAGCTTGAAGGA  | 1.91 ± 0.05             |

**Supplementary Figure 5. The singleton human tyrosine tRNA with the ATA anticodon does not increase UAG readthrough (A)** Schematic of the readthrough reporter containing the U6-tRNAbox cassette. For details please refer to the main text. **(B)** Readthrough measurements using the UAG reporter with or without the indicated human tRNAs in the HEK293T cells. The schematics of base-pairing between individual tRNAs and the UAG stop codon is shown to the right of the name of each construct, followed by the gene identity with the tRNA sequence and the relative percentage of the UAG readthrough. The tRNA sequences were individually placed under the U6 promoter of the PBB168 reporter or its sense control PBB172 reporter (see Figure 1).

**A**

```

> tW01 Homo_sapiens_chr12.trna6-TrpCCA_ Trp (CCA) 72 bp
GACCTCGTGGCGCAACGGTAGCGCTCTGACTCCAGATCAGAAGGCTGCGTGTTCCGAATCACGTCGGGGTCA

> tW02 Homo_sapiens_chr17.trna6-TrpCCA_ Trp (CCA) 72 bp
GACCTCGTGGCGCAACGGTAGCGCTCTGACTCCAGATCAGAAGGTTGCGTGTTCAAATCACGTCGGGGTCA

> tW02 Homo_sapiens_chr6.trna168-TrpCCA_ Trp (CCA) 72 bp
GACCTCGTGGCGCAACGGTAGCGCTCTGACTCCAGATCAGAAGGTTGCGTGTTCAAATCACGTCGGGGTCA

> tW02 Homo_sapiens_chr6.trna170-TrpCCA_ Trp (CCA) 72 bp
GACCTCGTGGCGCAACGGTAGCGCTCTGACTCCAGATCAGAAGGTTGCGTGTTCAAATCACGTCGGGGTCA

> tW03 Homo_sapiens_chr17.trna12-TrpCCA_ Trp (CCA) 72 bp
GACCTCGTGGCGCAATGGTAGCGCTCTGACTCCAGATCAGAAGGTTGCGTGTTCAAAGTCACGTCGGGGTCA

> tW04 Homo_sapiens_chr17.trna39-TrpCCA_ Trp (CCA) 72 bp
GECCTCGTGGCGCAACGGTAGCGCTCTGACTCCAGATCAGAAGGTTGCGTGTTCAAATCACGTCGGGGTCA

> tW05 Homo_sapiens_chr7.trna1-TrpCCA_ Trp (CCA) 72 bp
GACCTCGTGGCGCAACGGCAGCGCTCTGACTCCAGATCAGAAGGTTGCGTGTTCAAATCACGTCGGGGTCA

```

**B**

```

* * * * *
> tW01 GACCTCGTGGCGCAACGGTAGCGCTCTGACTCCAGATCAGAAGGCTGCGTGTTCCGAATCACGTCGGGGTCA
> tW02 GACCTCGTGGCGCAACGGTAGCGCTCTGACTCCAGATCAGAAGGTTGCGTGTTCAAATCACGTCGGGGTCA
> tW03 GACCTCGTGGCGCAATGGTAGCGCTCTGACTCCAGATCAGAAGGTTGCGTGTTCAAAGTCACGTCGGGGTCA
> tW04 GGCCTCGTGGCGCAACGGTAGCGCTCTGACTCCAGATCAGAAGGTTGCGTGTTCAAATCACGTCGGGGTCA
> tW05 GACCTCGTGGCGCAACGGCAGCGCTCTGACTCCAGATCAGAAGGTTGCGTGTTCAAATCACGTCGGGGTCA

```

**C**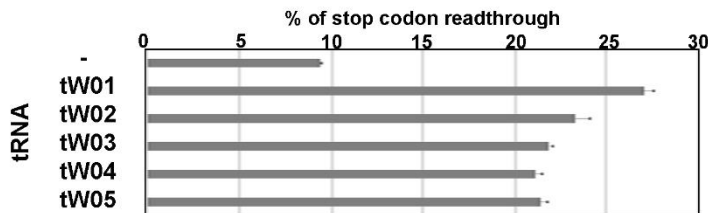

**Supplementary Figure 6. The single nucleotide polymorphism in human “high tRNA score” tryptophan iso-decoders does not impact the readthrough efficiency.** **(A)** Sequences of all available tryptophan tRNAs retrieved from the GtRNAdb (4,5). **(B)** The ClustalX2 alignment of the tRNA sequences from panel A. Single nucleotide polymorphisms (all are unique) are marked by a red asterisk on the top of sequences. **(C)** The UGA–AQP4 context readthrough measurements with overexpression of the indicated Trp tRNA iso-decoders under control of U6 in GL3051 (for UGA) or its sense control GL3052..



**A**

> tW01 Homo\_sapiens\_chr12.trna6-TrpCCA \_ Trp (CCA) 72 bp Sc: 71.65  
GACCTCGTGGCGCAACGGTAGCGCGTCTGACTCCAGATCAGAAGGcTGC GTTTCGAATCACGTCGGGGTCA

> tW06 Homo\_sapiens\_chr9.trna3-TrpCCA \_ Trp (CCA) 99 bp Sc: 23.38  
GGCAGAGgagGGTGCAGTTGGCAGCCTGTCCAAGTCCAGcacggttgagcacaggattagaATGGGATGGtCCTGG  
GTCAAACCCAGCTGCGCCC

> tW07 Homo\_sapiens\_chr11.trna19-TrpCCA \_ Trp (CCA) 74 bp Sc: 21.17  
GGAAGGATggGGCCAAGCTGGAAAGCCTGTGGGCTCCACAGTCATGTGCCTGGGTTCAAT  
TCCAGTTCTGCAT

**B**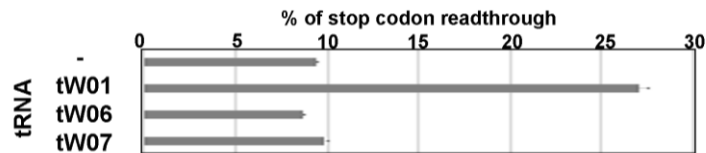

**Supplementary Figure 7. Bioinformatically predicted “low tRNA score” tryptophan tRNA pseudogenes do not increase UAG readthrough.** (A) tW01 and two other tryptophan tRNA sequences retrieved from the GtRNadb (4,5) that were experimentally shown not to increase the UGA readthrough. (B) The UGA-AQP4 context readthrough measurements with overexpression of tW01 and the indicated Trp tRNA pseudogenes under control of U6 in GL3051 (for UGA) or its sense control GL3052.

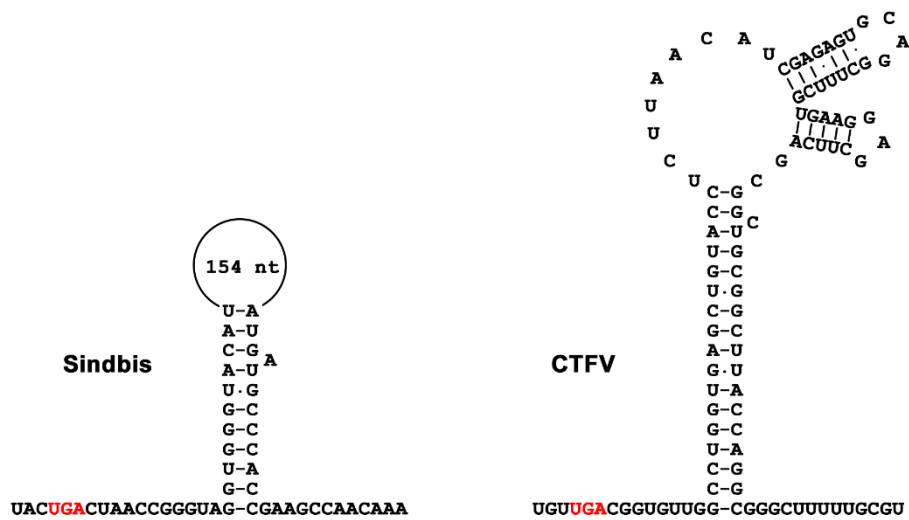

**Supplementary Figure 8. Schematics of the structural features of the Sindbis virus (SINV) (6) and Colorado thick fever virus (CTFV) (7) increasing the UGA readthrough. For details see the main text and Figure 5A.**
